# Supplementary material
Source: PubMed Central journal article supplement (PMC10085971)
Supplement: mmc1.pdf [file mmc1.pdf]

# Global uncertainty in the diagnosis of neurological complications of COVID-19 by both neurologists and non-neurologists: An international inter-observer variability study

## 1. Global Neuro-Research Coalition Members – List of study group members for PUBMED

### 1.1 Survey Respondents

| First Name    | Last Name          |
|---------------|--------------------|
| Maritoni      | Abbariao           |
| Shafiq Dexter | Abou Zaki          |
| Dejan         | Aleksic            |
| Nicole        | Aliling            |
| Susana        | Arias Rivas        |
| Godard        | Artajos            |
| Melody        | Asukile            |
| Arife Çimen   | Atalar             |
| Jong Seok     | Bae                |
| Chimeglkham   | Banzrai            |
| Michal        | Bar                |
| Valentina     | Barone             |
| Betul         | Baykan             |
| Ettore        | Beghi              |
| Thomas        | Berger             |
| Ivica         | Bilic              |
| Jose          | Biller             |
| Mateja        | Boskovic           |
| Verónica      | Cabreira           |
| Sofia         | Calado             |
| Maria Teresa  | Canete             |
| Nese          | Celebisoy          |
| Ike Leon      | Chen               |
| Lorraine      | Chishimba          |
| Mashina       | Chomba             |
| Glenn Anthony | Constantino        |
| Maria Sofia   | Cotelli            |
| Harald        | De Cauwer          |
| Thomas        | Debroucker         |
| Luis          | Del Carpio-Orantes |
| Rashmi        | Devaraj            |
| Michelle      | D'Souza            |
| Esme          | Ekizoglu           |
| Ayse Deniz    | Elmali             |
| Ana Catarina  | Fonseca            |
| Roberto       | Furloni            |
| Sunil         | Gajre              |
| David         | Garcia Azorin      |

|                    |                      |
|--------------------|----------------------|
| Vanessa            | Garfoot              |
| Irena              | Gasparic             |
| Hamit              | Genç                 |
| Marinka            | Glavica              |
| Luiz Gustavo       | Guanaes              |
| Gizem              | Gürsoy               |
| Nauman             | Hafiz                |
| Buse               | Hasırcı              |
| Raimund            | Helbok               |
| Chee Peng          | Hor                  |
| Stella             | Hughes               |
| Sungeun            | Hwang                |
| Irem               | Ilgezdi Kaya         |
| Adi                | Jakupi               |
| Roland Dominic     | Jamora               |
| Jamil              | Kahwagi              |
| Ara                | Kaprelyan            |
| Nfwama             | Kawatu               |
| Manho              | Kim                  |
| Hyunji             | Kim                  |
| Hyun Kyung         | Kim                  |
| Desmond            | Koffie               |
| Filipa             | Ladeira              |
| Suzannah           | Lant                 |
| Woo-Jin            | Lee                  |
| Sukyoon            | Lee                  |
| Zerlyn             | Leonardo             |
| Christian Emmanuel | Lim                  |
| Marijana           | Lisak                |
| Hong Chuan         | Loh                  |
| Lay Khoon          | Loo                  |
| Arijana            | Lovrencic-<br>Huzjan |
| Rosie Sue Luan     | Lu Koh               |
| Mesu'a Kabwa       | Luabeya              |
| Alessandra         | Lugaresi             |
| Bernadette         | Macrohon             |
| Maja               | Majdak               |
| Sheryl             | Manalili             |
| FILIPPO            | MANELLI              |
| Yacouba Njankouo   | Mapoure              |
| Davide             | Mascarella           |
| João               | Massano              |
| Mataa              | Mataa                |
| Jessica Leika      | Matibag              |
| Alexandria         | Matic-Gerodias       |

|                            |                   |
|----------------------------|-------------------|
| Kate                       | McMullen          |
| Miguel                     | Miranda           |
| Margaret                   | Modequillo        |
| Abul Kalam                 | Mohammed<br>Shoab |
| Cristina                   | Motto             |
| Sinead M.                  | Murphy            |
| Naluca                     | Mwendaweli        |
| Chen Fei                   | Ng                |
| Rong Xiang                 | Ng                |
| Mohd Khairul Nizam         | Nor Ihsan         |
| Aye Myat                   | Nyein             |
| Karen                      | O'Connell         |
| Seong-il                   | Oh                |
| Ohnmar                     | Ohnmar            |
| Aynur                      | Özge              |
| Azalea                     | Pajo              |
| Filipe                     | Palavra           |
| Larysa                     | Panteleienko      |
| Catherine                  | Payne             |
| Umberto                    | Pensato           |
| João                       | Peres             |
| Steven                     | Peters            |
| Burcu                      | Polat             |
| Zdravka                    | Poljakovic        |
| Martin Nicholas<br>Michael | Punter            |
| Liz Edenberg               | Quiles            |
| Angelo                     | Ranieri           |
| Marija                     | Ratković          |
| Maria Lina                 | Renales           |
| Jose                       | Robles            |
| Marina                     | Roje Bedeković    |
| Paulus                     | Rommer            |
| Lidija                     | Šapina            |
| Helena                     | Sarac             |
| Deanna                     | Saylor            |
| Erich                      | Schmutzhard       |
| Anahita                    | Sharma            |
| Aleksandra                 | Šimić             |
| Jussi O.T.                 | Sipilä            |
| Dilraj                     | Sokhi             |
| Mauro                      | Stagno            |
| Kristina                   | Stancheva         |
| Marija                     | Stojsavljević     |
| Ahamed                     | Subir             |

|                |             |
|----------------|-------------|
| Sushee         | Surdhar     |
| Loreto Jr      | Talabucon   |
| Hui Jan        | Tan         |
| Sing Chiek     | Teoh        |
| Dionis         | Vallejo     |
| Sibel K.       | Velioglu    |
| Rafaela        | Vukasović   |
| Wong           | Wai Kit     |
| Tamara         | Welte       |
| Barbara        | Willekens   |
| Nilufer        | Yesilot     |
| Nilufer        | Yesilot     |
| Jeryl Ritzi T. | Yu          |
| Moe Moe        | Zaw         |
| Sashka         | Zhelyazkova |
| Eva            | Žitnik      |

## 1.2 General Coalition members

| First Name       | Last Name              |
|------------------|------------------------|
| Foad             | Abd-Allah              |
| Mohamed          | Abdelhaleem            |
| Ricardo          | Allegri                |
| Toe Thiri        | Aung                   |
| Mian             | Ayaz Ul Haq            |
| Claudio          | Bassetti               |
| Betül            | Baykan                 |
| Ettore           | Beghi                  |
| Maja             | Bresjanac              |
| Bruce            | Brew                   |
| Maria Lúcia      | Brito Ferreira         |
| Ismael           | Calandri               |
| Bill             | Carroll                |
| Chahnez          | Charfi Triki           |
| Tina             | Charway-Felli          |
| Sherry Hsiang-Yi | Chou                   |
| Josep            | Dalmau                 |
| Guillermo        | Delgado Garcia         |
| Rashmi           | Devaraj                |
| Pete             | Dickinson              |
| Ava              | Easton                 |
| Julius           | Emmrich                |
| Mohamed          | Fahmy Doheim           |
| Valery           | Feigin                 |
| César            | Fernández-de-las-Peñas |
| Ericka           | Fink                   |
| Agnès            | Fleury                 |

|              |                       |
|--------------|-----------------------|
| Jennifer     | Frontera              |
| Satish       | Gaddam                |
| Milena       | Gandy                 |
| David        | García Azorín         |
| Ciro         | Gargiulo Isacco       |
| Hasim        | Gezezen               |
| Giorgia      | Giussani              |
| Alla         | Guekht                |
| Raimund      | Helbok                |
| Kerstin      | Hellwig               |
| Günter       | Höglinger             |
| Fan Kee      | Hoo                   |
| Olufemi      | Idowu                 |
| Ömer         | Karadaş               |
| Josua        | Kegele                |
| Abdul Hanif  | Khan                  |
| Christine    | Klein                 |
| Samuel       | Knauss                |
| Suzie        | Lant                  |
| Phyu Phyu    | Lay                   |
| Matilde      | Leonardi              |
| Massimo      | Leone                 |
| Maurizio     | Leone                 |
| Paul         | Lingor                |
| Gareth       | Lipunga               |
| Sofia        | Maldonado<br>Slootjes |
| Molly        | McNett                |
| Benedict     | Michael               |
| Elena        | Moro                  |
| Tamara       | Welte (nee<br>Müller) |
| Pablo        | Najt                  |
| Ingrid       | Ndaba -<br>Jongenelen |
| M            | Netravathi            |
| Ma           | Ohnmar                |
| Celia        | Oreja-Guevara         |
| Aynur        | Özge                  |
| Alessandro   | Padovani              |
| Payal        | Patel                 |
| Ross         | Paterson              |
| Kithsiri     | Pathirana             |
| Bettina      | Pfausler              |
| Kameshwar    | Prasad                |
| Marina       | Romozzi               |
| Gustavo      | Roman                 |
| Behzad       | Saberi                |
| Mohamed      | Salama                |
| Fred Stephen | Sarfo                 |

|              |               |
|--------------|---------------|
| Parthasarthy | Satishchandra |
| Deanna       | Saylor        |
| Erich        | Schmutzhard   |
| Jim          | Sejvar        |
| Ali          | Shalash       |
| Zarni Myint  | Shwe          |
| Omar         | Siddiqi       |
| Tom          | Solomon       |
| Marianna     | Spatola       |
| Peter        | Spencer       |
| Vivian       | Ssonko        |
| Richard      | Stark         |
| Felix        | Sukums        |
| Matthis      | Synofzik      |
| Pille        | Taba          |
| Fabrizio     | Tagliavini    |
| Arina        | Tamborska     |
| Kiran        | Thakur        |
| Derya        | Uludüz        |
| Thirugnanam  | Umapathi      |
| Jayant       | Vadav         |
| Rita         | Valentino     |
| Jeevagan     | Vijayabala    |
| Alberto      | Vogrig        |
| Glynn        | Webb          |
| Karin        | Weissenborn   |
| Erica        | Westenberg    |
| David        | Wiebers       |
| Tissa        | Wijeratne     |
| Andrea       | Winkler       |
| Greta        | Wood          |
